# Supplementary material for: Ultrastructure of influenza virus ribonucleoprotein complexes during viral RNA synthesis
Source: Research Square preprint supplement (doi:10.21203/rs.3.rs-198950/v1), 2021-02-16
Supplement: Supplementary file 1 [file b7c11cb9620ddca143cdc9e7.pdf]

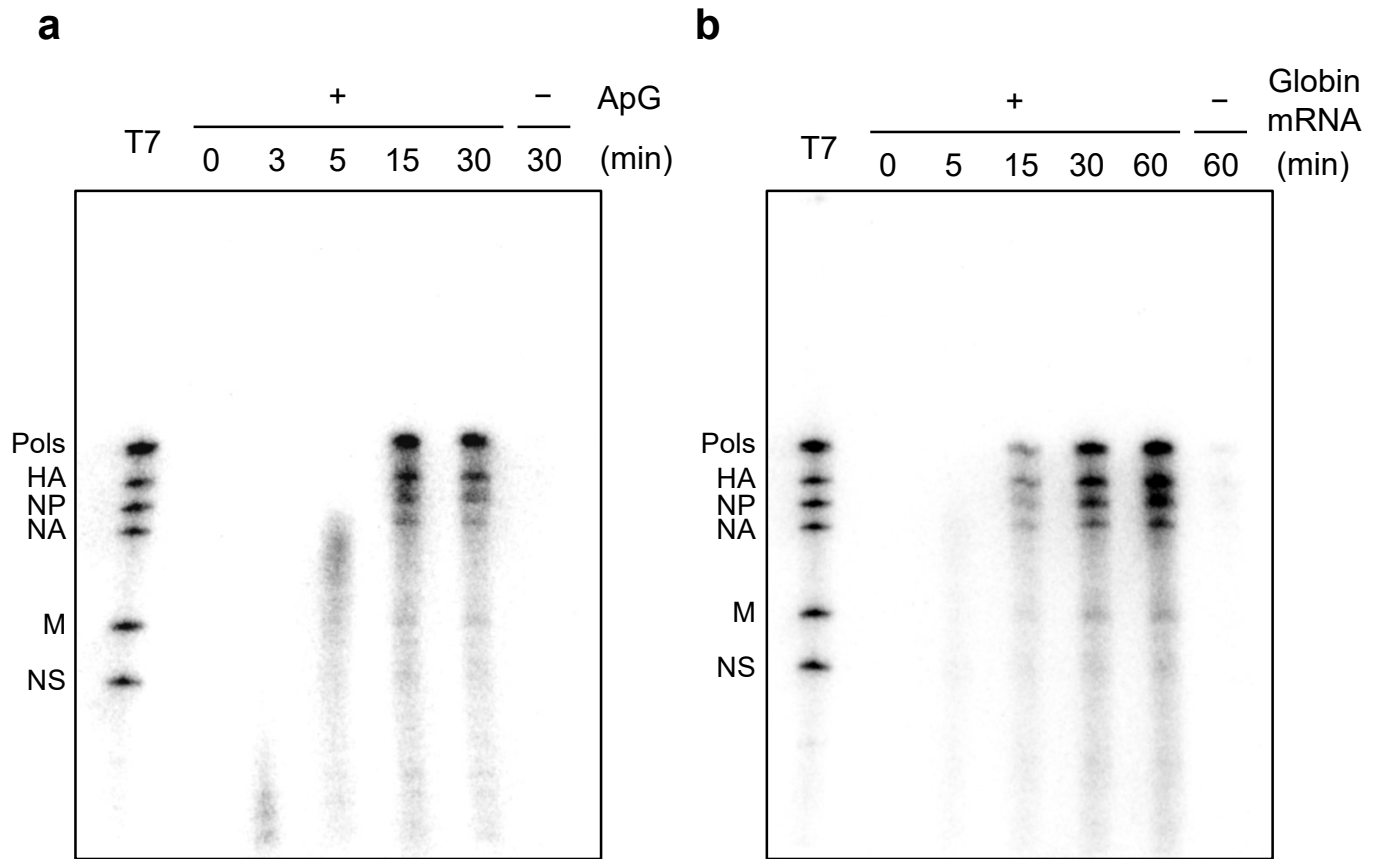

**Supplementary Fig. 1. *In vitro* RNA synthesis using virion-derived vRNPs.**

**a**, Time course of *in vitro* RNA synthesis using ApG as a primer. RNA was synthesized *in vitro* with or without ApG for 0, 3, 5, 15, or 30 min. **b**, Time course of *in vitro* RNA synthesis using globin mRNA. RNA was synthesized *in vitro* with or without globin mRNA for 0, 5, 15, 30, or 60 min. Purified RNAs were analysed on a 4% polyacrylamide gel containing 7 M urea and detected by autoradiography. T7 represents a mixture of eight vRNAs synthesized by T7 RNA polymerase, which is the same as used in Fig. 1.

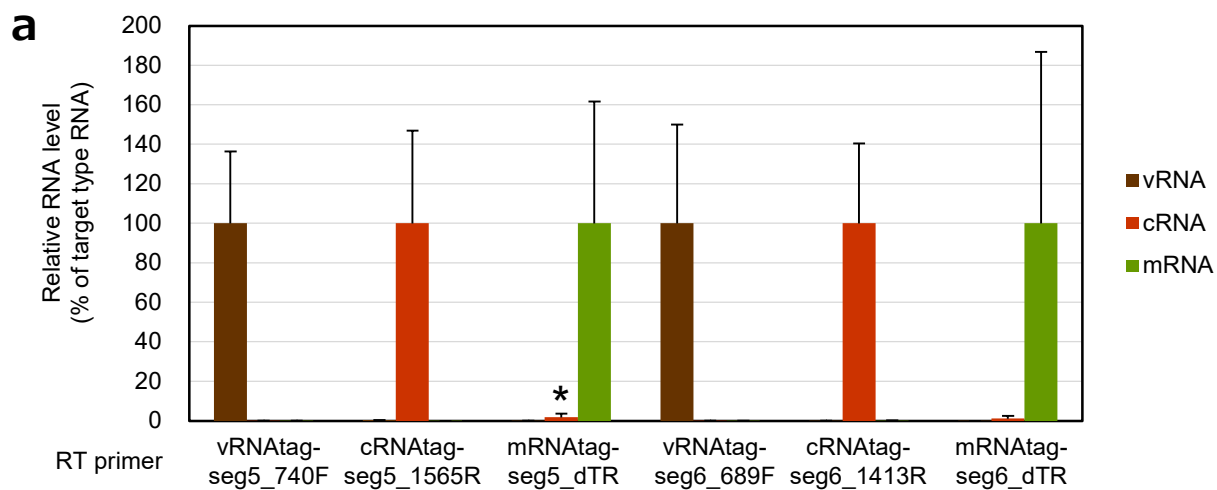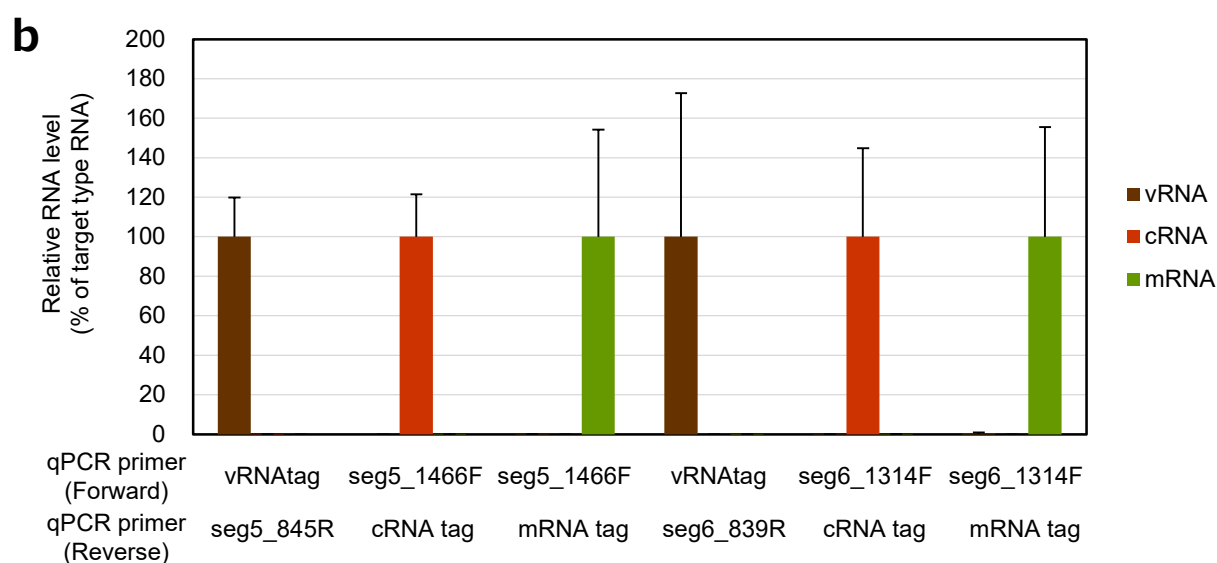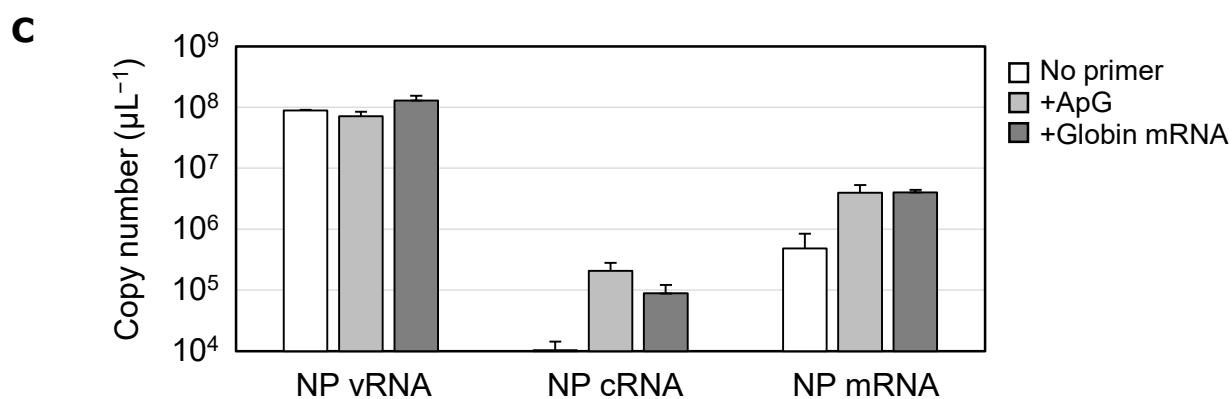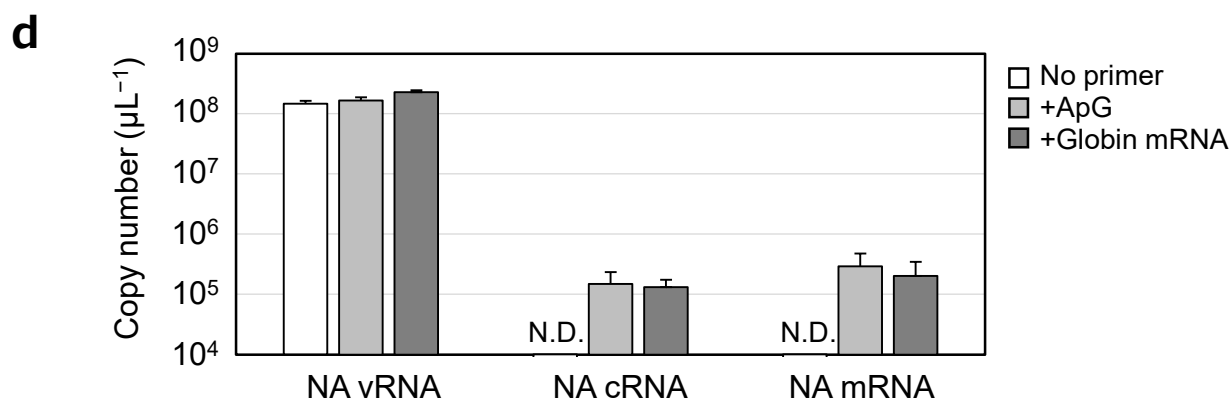

**Supplementary Fig. 2. Characterization of RNA products with strand-specific RT-qPCR.**

**a**, Specificity of primers for reverse transcription. First, the standard vRNA (brown), cRNA (red), and mRNA (green) were reverse-transcribed into cDNAs using the tagged RT primers shown in the graph. The obtained tagged cDNAs were then amplified by qPCR using the corresponding tagged portion of the cDNA and a segment-specific oligonucleotide as primers. The average molecular number and standard deviation of triplicate experiments are presented as a percentage of the average value of the target type of RNA. The condition that resulted in the largest non-specific amplification was the case in which the mRNA reverse-transcription primer was used for the cRNA template (asterisk); The relative level of non-specifically amplified RNA was calculated as 1.73% of the mRNA template. **b**, Specificity of primers for qPCR. Standard vRNA (brown), cRNA (red), and mRNA (green) were reverse-transcribed into cDNA using the corresponding RT primers. Using these cDNAs as templates, different sets of primers shown in the graph were used for qPCR. The average molecular number and standard deviation of three independent experiments are presented as in **a**. All estimated values of relative RNA levels were less than 0.5% of each target type RNA, indicating almost no non-specific amplification by different pairs of qPCR primers. **c**, **d**, Copy numbers of vRNA, cRNA, and mRNA of NP (**c**) or NA (**d**) segment in reaction mixtures were quantified using standard RNAs, which were synthesized with T7 RNA polymerase. N.D. means "not detected" (copy number is less than  $1 \times 10^4 \mu\text{L}^{-1}$ ). Error bars represent the standard deviation of three independent experiments.

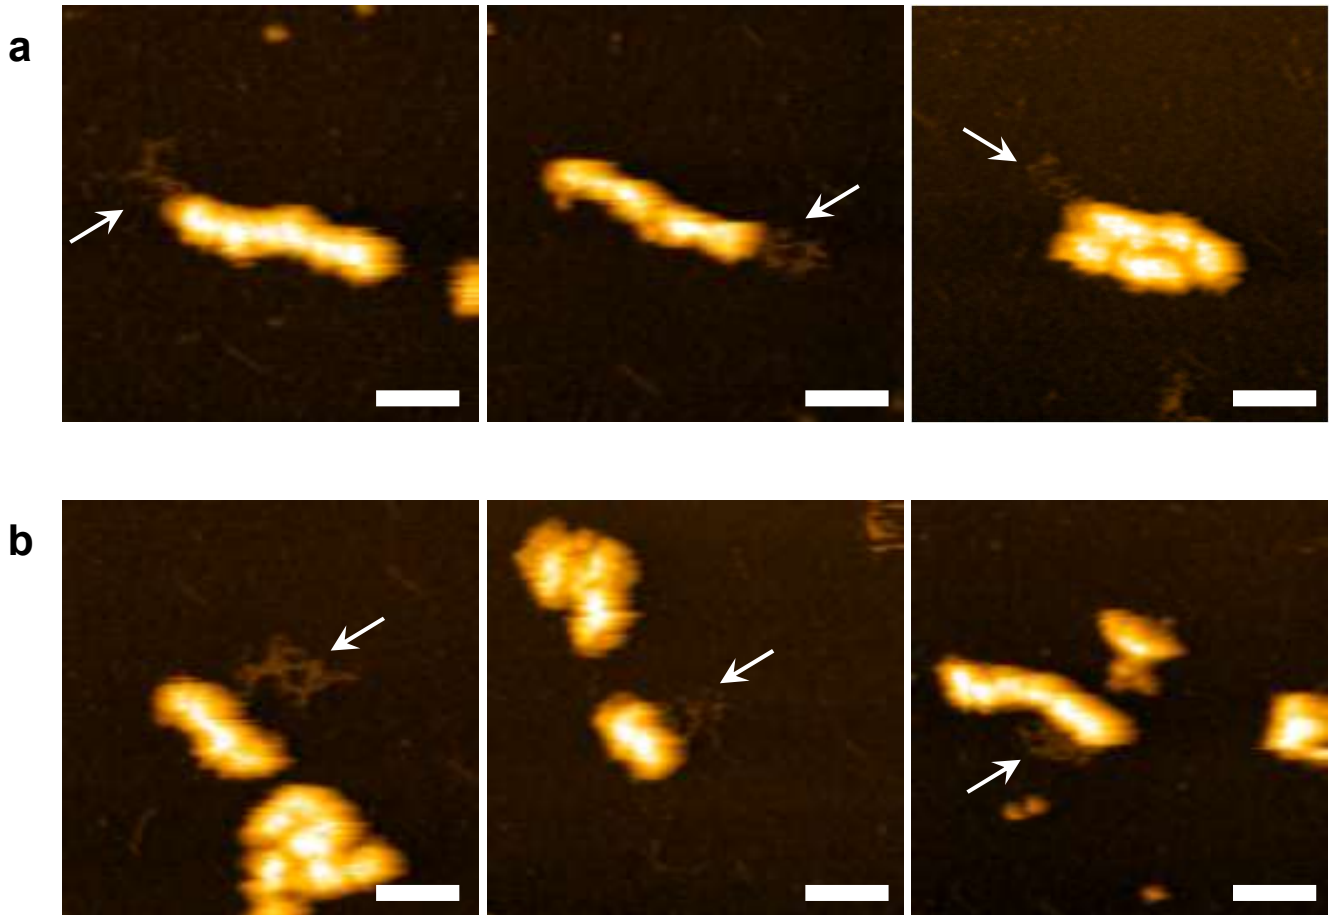

**Supplementary Fig. 3. HS-AFM observation of vRNPs associated with a structured RNA.**

*In vitro* RNA synthesis was performed using virion-derived vRNPs and ApG primer, and samples were observed with HS-AFM. Structured RNAs observed at the tip (**a**, arrows) and body of rod-shaped vRNPs (**b**, arrows) are shown. Scale bar on all images represents 50 nm.

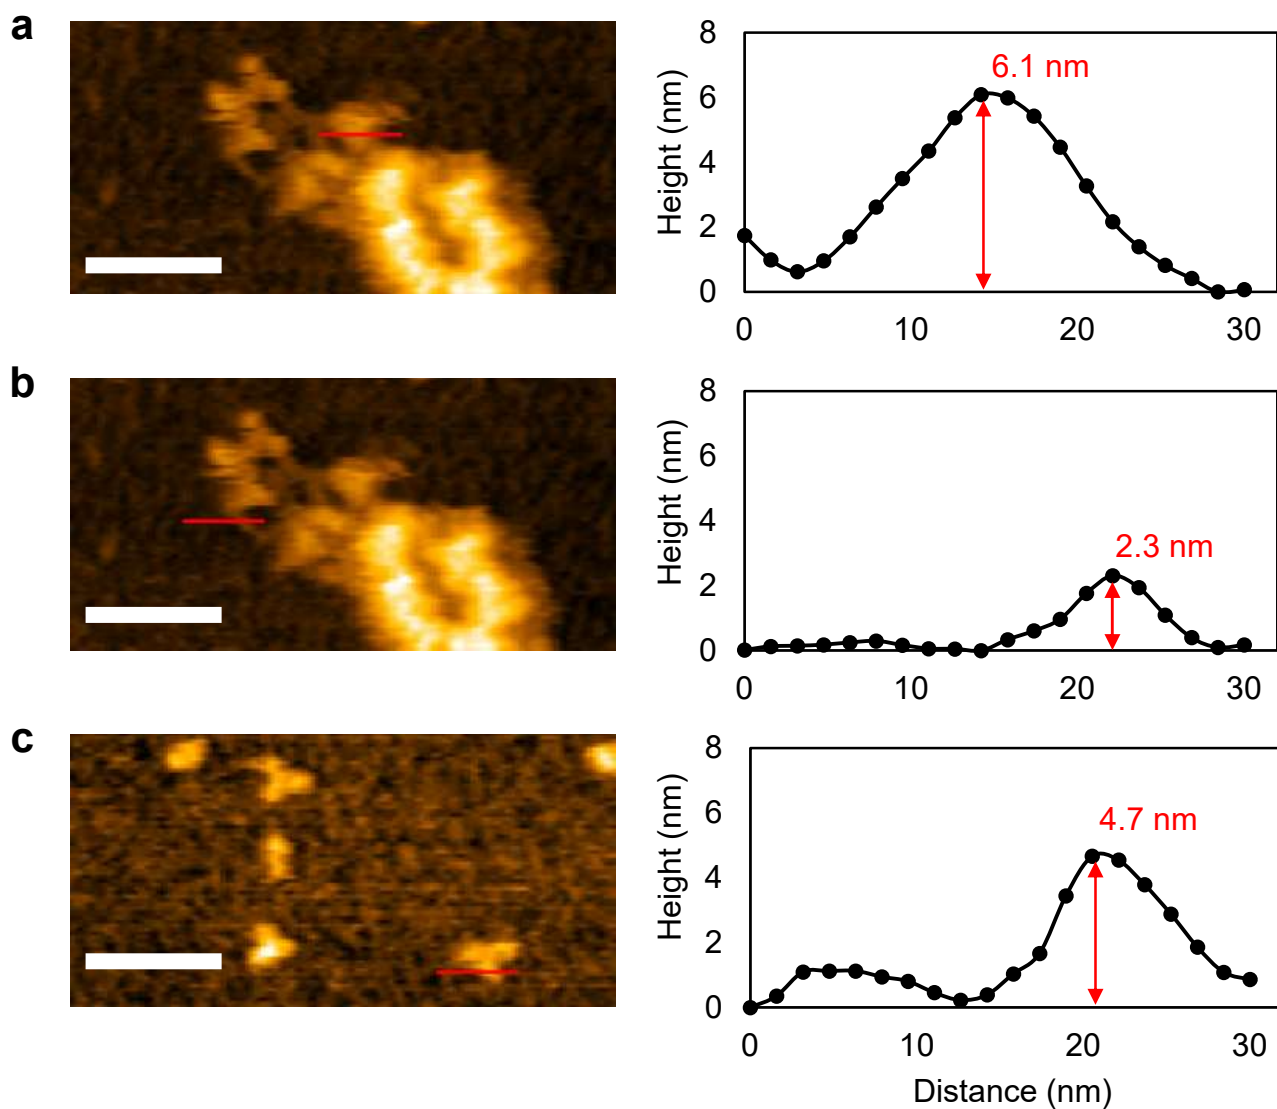

**Supplementary Fig. 4. Section analysis of anti-Br-UTP antibody binding to RNA.**

**a, b**, Enlarged HS-AFM images of Fig. 3c are shown on the left. In the right panels, heights of the antibody (**a**) and the structured RNA (**b**) were measured by section analysis at red lines shown in the left panels and revealed to be 6.1 nm and 2.3 nm, respectively. **c**, An HS-AFM image of free anti-Br-UTP antibodies is shown on the left. The section analysis at the red line is shown in the right panel and the height of the antibody was 4.7 nm. Scale bars on all HS-AFM images represent 50 nm.

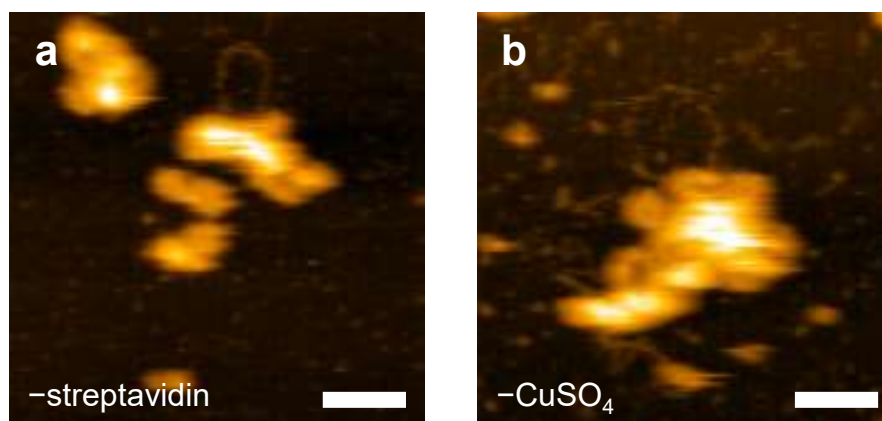

**Supplementary Fig. 5. Control experiments for the Click reaction.**

The sample for HS-AFM observation was prepared without streptavidin (**a**) or a Click reaction (omitting CuSO<sub>4</sub>, **b**). No protein binding was observed in any of these images. Results were reproduced at least 5 times. The scale bars represent 50 nm.

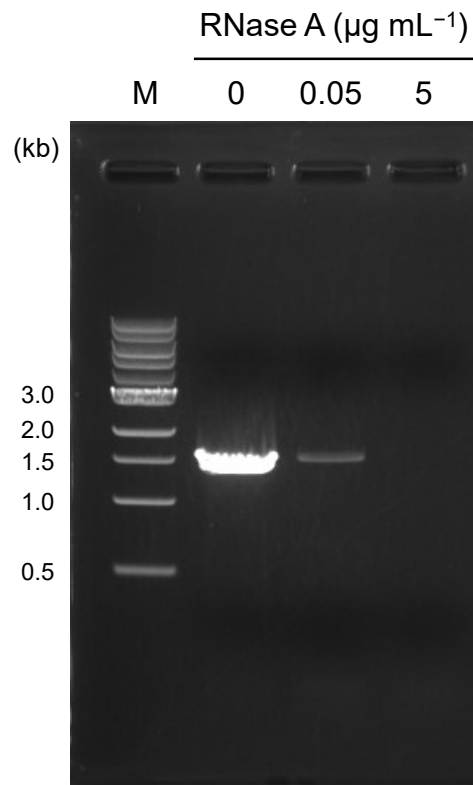

**Supplementary Fig. 6. Lack of intact, residential vRNA in RNase A-treated vRNP**

vRNP was treated with indicated concentrations of RNase A and total RNA was purified. Purified RNA was used in RT-PCR to amplify the DNA fragment of the full-length NP segment (1,565 bp). The PCR product was analysed on 1% agarose gel electrophoresis. M indicates DNA size marker (New England Biolabs).

## [pattern A]

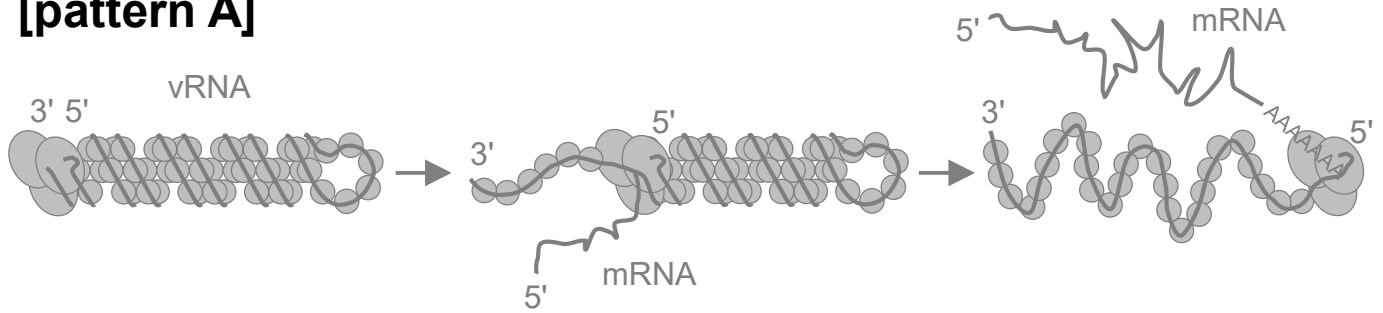

## [pattern B]

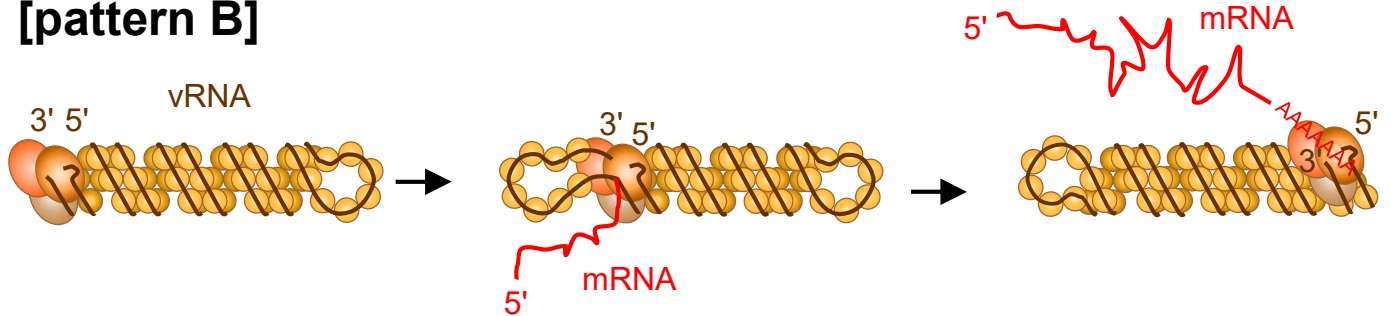

### Supplementary Fig. 7. Models for producing structured RNA.

Possible patterns for synthesis of structured RNA are depicted. Patterns A and B show synthesis of mRNA, with the 5' end of vRNA bound to RNA polymerase during transcription. In pattern A, the 3' end of vRNA is detached from the RNA polymerase. In this case, the helical structure of vRNP is relaxed and a single NP-RNA strand appears. In pattern B, both the 5' and 3' ends of vRNA are bound to RNA polymerase. Due to the binding of the 3' end of vRNA to the polymerase, the transcribed vRNA assembles into a helical structure, and the vRNP is able to keep its helical rod shape.



**Supplementary Table 1. Primers used for preparation of standard RNAs.**

| Target |      | Primer name      | Sequence (5'-3')                                   |
|--------|------|------------------|----------------------------------------------------|
| NP     | vRNA | PR8seg5_1F       | AGCAAAAGCAGGGTAGATAATCAC                           |
|        |      | T7_PR8seg5_1565R | GGATCCTAATACGACTCACTATAGGGAGTAGAAACAAGGGTATTTTCTT  |
|        | cRNA | T7_PR8seg5_1F    | GGATCCTAATACGACTCACTATAGGGAGCAAAAGCAGGGTAGATAATCAC |
|        |      | PR8seg5_1565R    | AGTAGAAACAAGGGTATTTTCTT                            |
|        | mRNA | T7_PR8seg5_1F    | GGATCCTAATACGACTCACTATAGGGAGCAAAAGCAGGGTAGATAATCAC |
|        |      | PR8seg5_dTR      | TTTTTTTTTTTTTTTTCTTTAATTGTCGTACTCCTC               |
| NA     | vRNA | PR8seg6_1F       | AGCAAAAGCAGGGGTTTAAATGA                            |
|        |      | T7_PR8seg6_1413R | GGATCCTAATACGACTCACTATAGGGAGTAGAAACAAGGAGTTTTTGAA  |
|        | cRNA | T7_PR8seg6_1F    | GGATCCTAATACGACTCACTATAGGGAGCAAAAGCAGGGGTTTAAATGA  |
|        |      | PR8seg6_1413R    | AGTAGAAACAAGGAGTTTTTGAA                            |
|        | mRNA | T7_PR8seg6_1F    | GGATCCTAATACGACTCACTATAGGGAGCAAAAGCAGGGGTTTAAATGA  |
|        |      | PR8seg6_dTR      | TTTTTTTTTTTTTTTTTGAACAGACTACTTGTCATG               |

**Supplementary Table 2. Primers used for preparation of marker RNAs.**

| Target | Primer name      | Sequence (5'-3')                                   |
|--------|------------------|----------------------------------------------------|
| PB2    | WSNseg1_1F       | AGCGAAAGCAGGTCAATTATATTC                           |
|        | T7_WSNseg1_2341R | GGATCCTAATACGACTCACTATAGGGAGTAGAAACAAGGTCGTTTTTAAA |
| PB1    | WSNseg2_1F       | AGCGAAAGCAGGCAAACCATTTGA                           |
|        | T7_WSNseg2_2341R | GGATCCTAATACGACTCACTATAGGGAGTAGAAACAAGGCATTTTTTCAT |
| PA     | WSNseg3_1F       | AGCGAAAGCAGGTACTGATTCAAA                           |
|        | T7_WSNseg3_2233R | GGATCCTAATACGACTCACTATAGGGAGTAGAAACAAGGTACTTTTTTGG |
| HA     | WSNseg4_1F       | AGCAAAAGCAGGGGAAAATAAAAA                           |
|        | T7_WSNseg4_1775R | GGATCCTAATACGACTCACTATAGGGAGTAGAAACAAGGGTGTTTTTCCT |
| NP     | WSNseg5_1F       | AGCAAAAGCAGGGTAGATAATCACTC                         |
|        | T7_WSNseg5_1565R | GGATCCTAATACGACTCACTATAGGGAGTAGAAACAAGGGTATTTTTCTT |
| NA     | WSNseg6_1F       | AGCGAAAGCAGGAGTTTAAATGAATCCAAACC                   |
|        | T7_WSNseg6_1409R | GGATCCTAATACGACTCACTATAGGGAGTAGAAACAAGGAGTTTTTTGAA |
| M      | WSNseg7_1F       | AGCAAAAGCAGGTAGATATTGAAA                           |
|        | T7_WSNseg7_1027R | GGATCCTAATACGACTCACTATAGGGAGTAGAAACAAGGTAGTTTTTTAC |
| NS     | WSNseg8_1F       | AGCAAAAGCAGGGTGACAAAGACA                           |
|        | T7_WSNseg8_890R  | GGATCCTAATACGACTCACTATAGGGAGTAGAAACAAGGGTGTTTTTTAT |

**Supplementary Table 3. Primers used for RT-qPCR.**

| Target |      | Purpose               | Primer name                        | Sequence (5'-3')                             |
|--------|------|-----------------------|------------------------------------|----------------------------------------------|
| NP     | vRNA | Reverse transcription | vRNA <sub>tag</sub> -PR8seg5_740F  | GGCCGTCATGGTGGCGAATCTGCTGCACAAAAGCAATGATGG   |
|        |      | qPCR                  | vRNA <sub>tag</sub>                | GGCCGTCATGGTGGCGAAT                          |
|        |      |                       | PR8seg5_845R                       | CTCAATATGAGTGCAGACCGTGCT                     |
|        | cRNA | Reverse transcription | cRNA <sub>tag</sub> -PR8seg5_1565R | GCTAGCTTCAGCTAGGCATCAGTAGAAACAAGGGTATTTTCTTT |
|        |      | qPCR                  | PR8seg5_1466F                      | CGATCGTGCCTTCCTTTGACATGA                     |
|        |      |                       | cRNA <sub>tag</sub>                | GCTAGCTTCAGCTAGGCATC                         |
|        | mRNA | Reverse transcription | mRNA <sub>tag</sub> -PR8seg5_dTR   | GCCAGATCGTTCGAGTCGTTTTTTTTTTTTTTTTCTTTAATTG  |
|        |      | qPCR                  | PR8seg5_1466F                      | CGATCGTGCCTTCCTTTGACATGA                     |
|        |      |                       | mRNA <sub>tag</sub>                | GCCAGATCGTTCGAGTCGT                          |
| NA     | vRNA | Reverse transcription | vRNA <sub>tag</sub> -PR8seg6_689F  | GGCCGTCATGGTGGCGAATTTTACTATAATGACTGATGGCCCG  |
|        |      | qPCR                  | vRNA <sub>tag</sub>                | GGCCGTCATGGTGGCGAAT                          |
|        |      |                       | PR8seg6_839R                       | CACTTTGCCGGTATCAGGGTAACA                     |
|        | cRNA | Reverse transcription | cRNA <sub>tag</sub> -PR8seg6_1413R | GCTAGCTTCAGCTAGGCATCAGTAGAAACAAGGAGTTTTTGAAC |
|        |      | qPCR                  | PR8seg6_1314F                      | GGCGTGAATAGTGATACTGTAGAT                     |
|        |      |                       | cRNA <sub>tag</sub>                | GCTAGCTTCAGCTAGGCATC                         |
|        | mRNA | Reverse transcription | mRNA <sub>tag</sub> -PR8seg6_dTR   | GCCAGATCGTTCGAGTCGTTTTTTTTTTTTTTTGAACAGACT   |
|        |      | qPCR                  | PR8seg6_1314F                      | GGCGTGAATAGTGATACTGTAGAT                     |
|        |      |                       | mRNA <sub>tag</sub>                | GCCAGATCGTTCGAGTCGT                          |

## **Supplementary movie legends**

### **Supplementary movie 1. Digestion of looped RNA with RNase A**

During HS-AFM observation of looped RNA associated with vRNP, RNase A was added to the liquid chamber at a final concentration of  $0.5\ \mu\text{g mL}^{-1}$ . Scan area:  $300 \times 300\ \text{nm}^2$ . Observation period: 120 sec.

### **Supplementary movie 2. Digestion of looped RNA with RNase III**

RNase III was added at a final concentration of  $0.02\ \text{U}\ \mu\text{L}^{-1}$  during HS-AFM observation of looped RNA. Scan area:  $300 \times 300\ \text{nm}^2$ . Observation period: 76 sec.

### **Supplementary movie 3. Binding of anti-dsRNA antibodies to looped RNA**

Binding of anti-dsRNA antibodies to looped RNA was observed by HS-AFM. Scan area:  $300 \times 300\ \text{nm}^2$ . Observation period: 9 sec.

### **Supplementary movie 4. Binding of anti-dsRNA antibodies to structured RNA**

Binding of anti-dsRNA antibodies to structured RNA was observed by HS-AFM. Scan area:  $300 \times 300\ \text{nm}^2$ . Observation period: 9 sec.
